# Supplementary material
Source: Royal Society of Chemistry journal article supplement (https://www.rsc.org/suppdata/books/178801/9781788012140/bk9781788012140-001.pdf)
Supplement: Supplementary file 1 [file bk9781788012140-001.pdf]

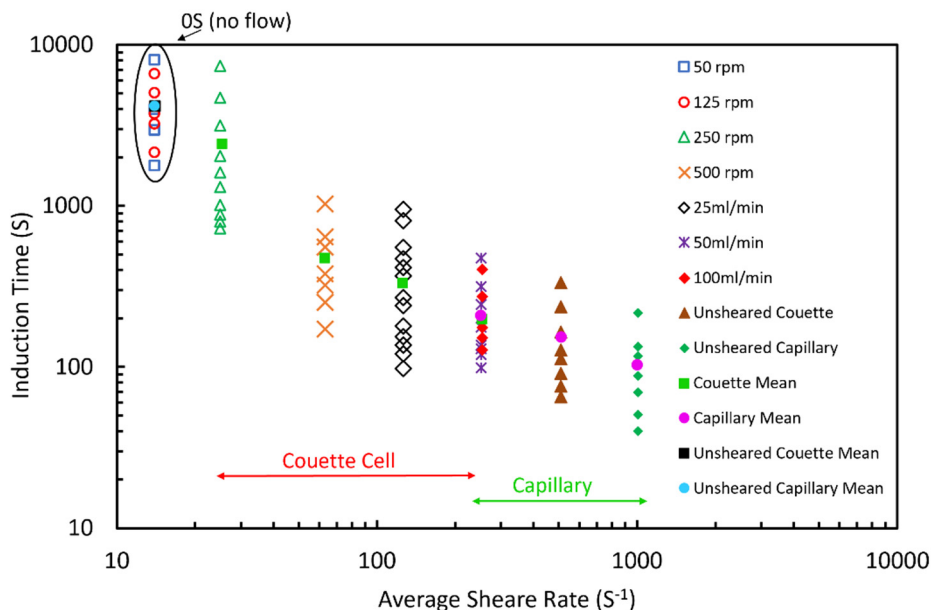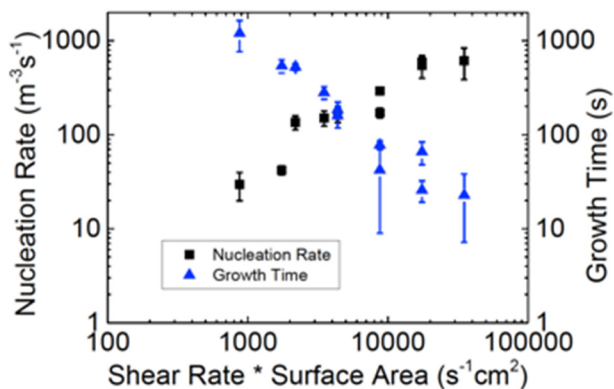

**Figure 1.1** Induction time (s), nucleation rates  $J$ , and growth times  $t_g$  estimated from a model fit as a function of the product of the average shear rate and surface area. Adapted from ref. 34 with permission from American Chemical Society, Copyright 2015, and ref. 35, <https://pubs.acs.org/doi/abs/10.1021/acs.cgd.5b01042>, with permission from American Chemical Society, Copyright 2016.
